# Supplementary material for: Long-term changes in the heat–mortality relationship according to heterogeneous regional climate: a time-series study in South Korea
Source: PubMed Central journal article supplement — BMJ Open. 2016 Aug 3;6(8):e011786. doi: 10.1136/bmjopen-2016-011786 (PMC4985795; doi:10.1136/bmjopen-2016-011786), 2016-08-03

Supplementary Figure 1. Yearly Relative Risks in the elderly (Left) and the young adults (Right) in each cluster: (a) Cluster H, (b) Cluster M, (c) Cluster C.

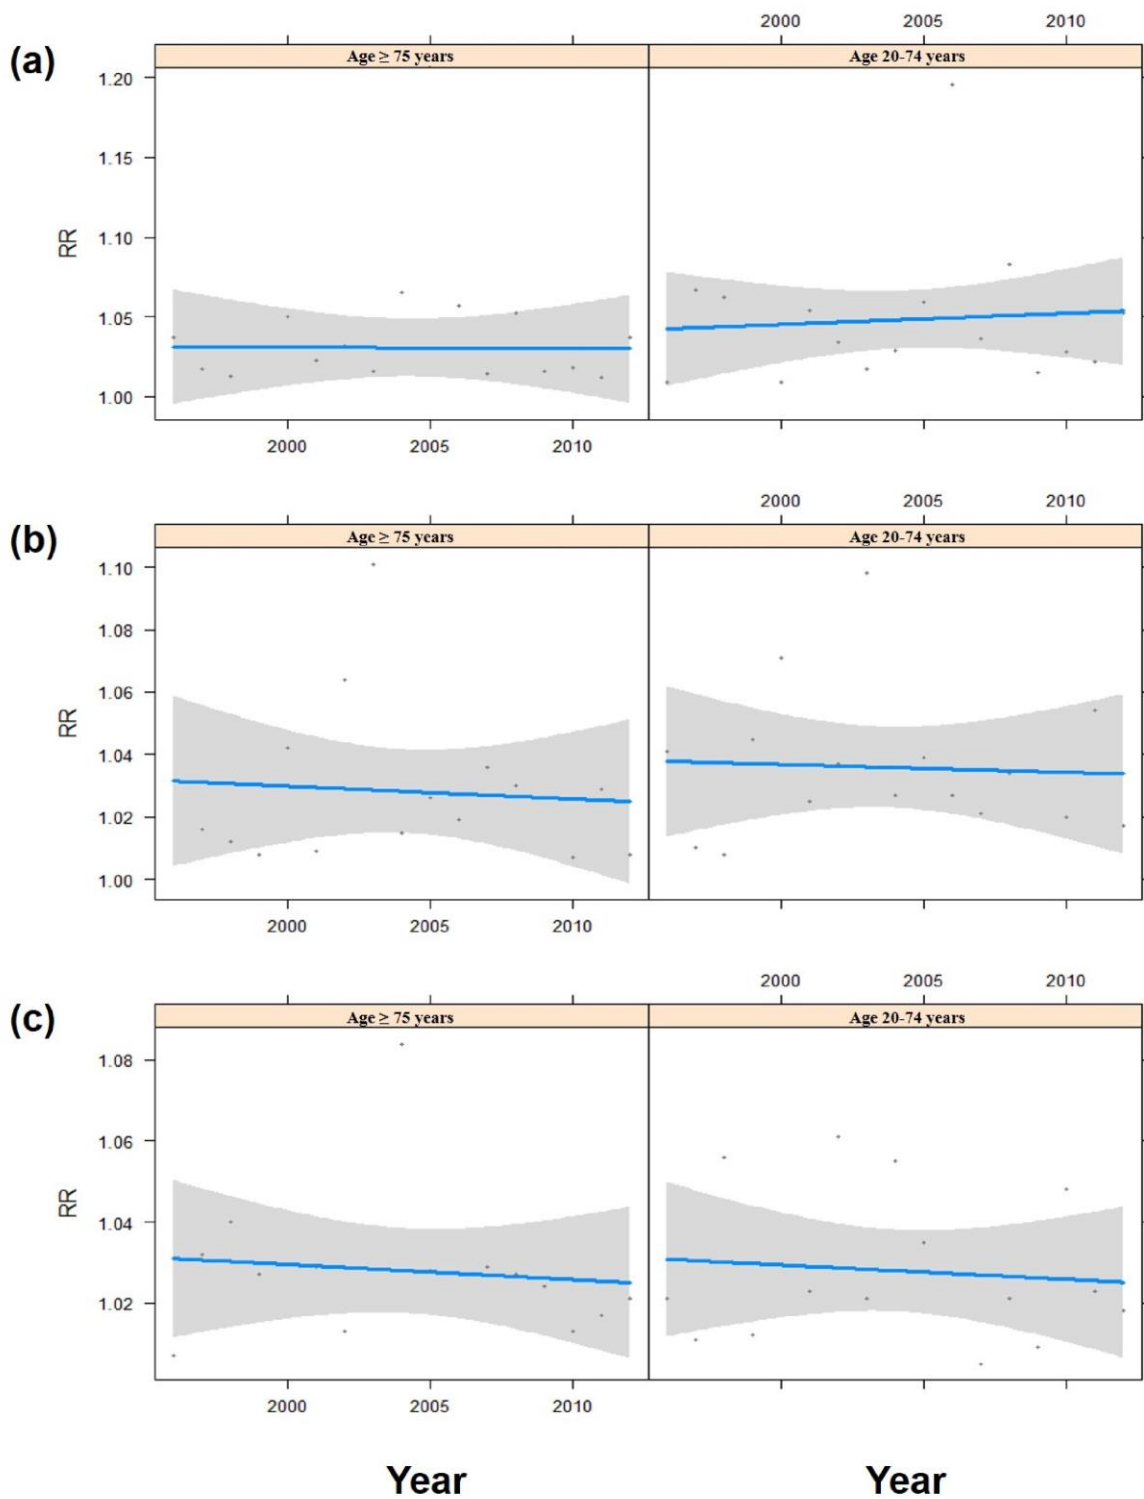

Supplement: bmjopen-2016-011786supp_figure.pdf [file bmjopen-2016-011786supp_figure.pdf]
